# Supplementary material
Source: PubMed Central journal article supplement (PMC4866999)
Supplement: NIHMS734492-supplement-Supplemental.pdf [file NIHMS734492-supplement-Supplemental.pdf]

**Supplementary figures:**

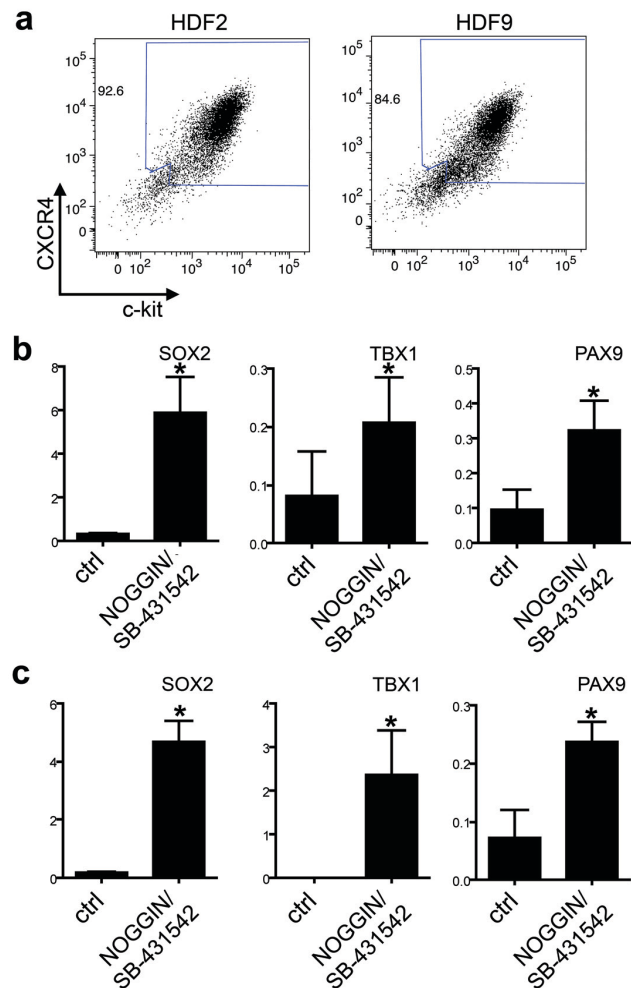

**Supplementary Figure 1: Induction of AFE markers in NOGGIN/SB-431542-treated definitive endoderm in hiPS cells. (a)** Representative flow cytometric analysis of definitive endodermal markers CXCR4 and C-KIT at day 5 of Activin A induction in HDF2 and HDF9 hiPS cells. **(b)** Expression of *FOXA2*, *SOX2*, and *PAX9* mRNA in HFGD2 and HDF9 hiPS cells on day 9 in cultures treated from day 5, after induction of definitive endoderm (see upper left panel), with either serum-free differentiation media (ctrl) or NOGGIN/SB-431542 (n=3 biological triplicate replicates, \*significantly different from media ctrl).

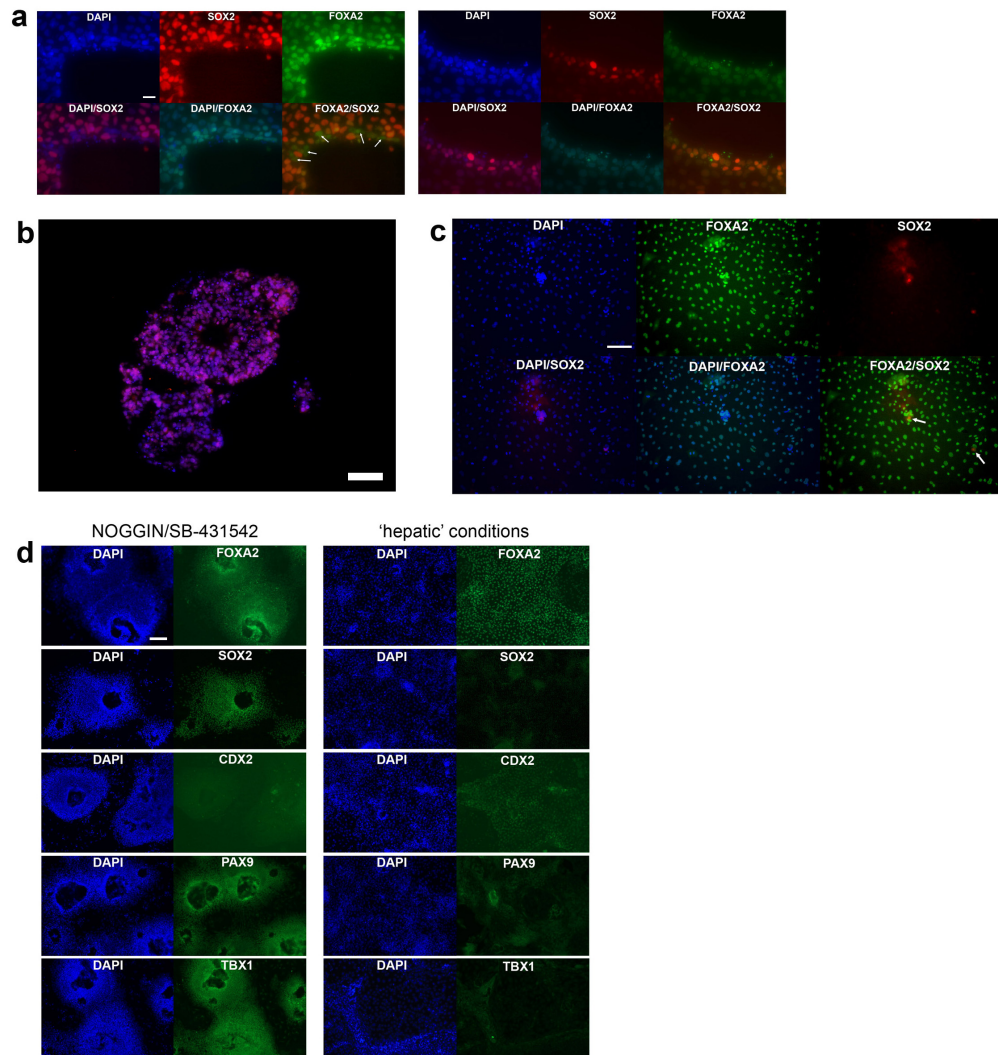

**Supplementary Figure 2. Immunofluorescence analysis of NOGGIN/SB-431542-treated definitive endoderm.** (a) Expression of FOXA2 and SOX2 at day 9 in cultures of HDF2 (left panel) and HFD9 (right panels) iPS cells treated on day 5, after induction of definitive endoderm, with NOGGIN/SB-431542. Scale bar, 25  $\mu$ . (b) Staining for SOX2 (red) and DAPI (blue) in colony generated in a Matrigel cultures (see Methods). Scale bar, 25  $\mu$ . (c) Expression of FOXA2 and SOX2 at day 9 in cultures of HFD9 treated on day 5, after induction of definitive endoderm, with serum-free differentiation media, without addition of NOGGIN/SB-431542 (10x, arrows: FOXA2<sup>+</sup>SOX2<sup>+</sup> cells). Scale bar, 100  $\mu$ . (d) Expression of FOXA2, SOX2, CDX2, PAX9 and TBX1 in day 9 cultures of HES2 cells treated in parallel with either NOGGIN/SB431542 or cultured in 'hepatic' conditions after induction of definitive endoderm until day 5. Scale bar, 100  $\mu$ .

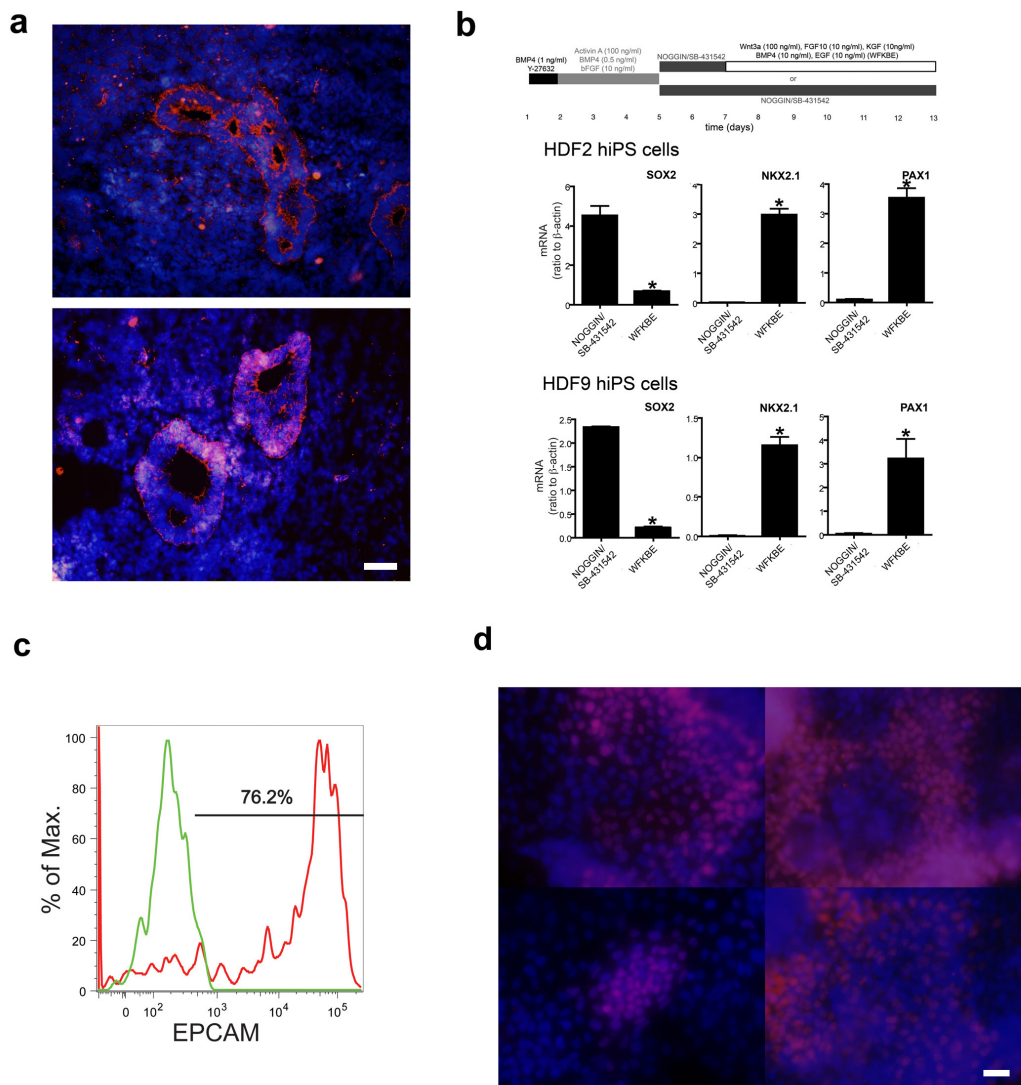

**Supplementary Figure 3: Function of AFE generated from hES and hiPS cells. (a)** Staining of growths arising 5 weeks after transplantation of NOGGIN/SB-431542-induced AFE cells (day 9) under the kidney capsule of NSG mice for SP-C. Scale bar, 100  $\mu$ . **(b)** Expression of *SOX1*, *NKX2.1*, and *PAX1* mRNA in HDF2 (upper) and HDF9 (lower) hiPS cells differentiated into AFE the conditions schematically represented on top of the panel (n=4 to 6 culture wells from 2 independent experiments, \*significantly different from NOGGIN/SB-431542 conditions). **(c)** Expression of EPCAM in HES2 cells differentiated into putative ventral AFE using NOGGIN/SB-431542 followed by WKFBE (green: isotype control, red: EPCAM). **(d)** High magnification views of NKX2.1 immunofluorescence of HDF2 cells differentiated into putative ventral AFE using NOGGIN/SB-431542 followed by WKFBE. Scale bar, 25  $\mu$ .

### Supplemental Table 1: Quantitative PCR Primer Sequences

| Gene            | Forward Primer (5' to 3')    | Reverse Primer (5' to 3')     |
|-----------------|------------------------------|-------------------------------|
| SOX2 hqPCR      | GCACATGAAGGAGCACCCGGATTA     | CGGGCAGCGTGTACTTATCCTTCTT     |
| GCM2 hqPCR      | CAGAGTGGGTCCCTTCTTTACCTACAAC | TGCCTTTCACATTTCCCTGCCT        |
| PAX1 hqPCR      | TTAGACTGCCGTACCCTCCTCACAA    | AGGAAGGGAAAGAGAAAAGGGGAAGGGA  |
| SFTPC hqPCR     | CCTTCTTATCGTGGTGGTGGTGGT     | TCTCCGTGTGTTTCTGGCTCATGT      |
| ACTB hqPCR      | TAAGTCCTGCCCTCATTTCCCTCT     | TTTGCGGATGTCCACGTCACTT        |
| GATA6 hqPCR     | AGTTCCTACGCTTCGCATCCCTTC     | TGAACAGCAGCAAGTCCCTCCA        |
| TBX1 hqPCR      | CGGCTCCTACGACTATTGCC         | GGAACGTATTCTTGCTTGCCCT        |
| SOX17 hqPCR     | CTGTTGAATCATAAGCTTGACCTGCC   | ATCTTAAACCCAGCGATGCTTGCC      |
| PAX6 hqPCR      | GGGATGAGGATGCATTGTGGTTGT     | GAGGAAGAAGAGGGAGAAGAAGGAAGAGG |
| PAX9 hqPCR      | TGGTTATGTTGCTGGACATGGGTG     | GGAAGCCGTGACAGAATGACTACCT     |
| CDX2 hqPCR      | TAAATGCCAGAGCCAACCTGACTTCC   | CAGCAGCAACAACAACAACTCCC       |
| FOXP2 hqPCR     | TCAGCAAATGCAGCAGATCCTTCAG    | ACAGCCTGCTGTTGTTGGAGAAG       |
| MIXL1 hqPCR     | CTGTGCTCCTGGAAGTAAACGAA      | TGACCTTGGGAGCTAGAGTCAGAGATG   |
| BRACHYURY hqPCR | CAGTGGCAGTCTCAGGTTAAGAAGGA   | CGCTACTGCAGGTGTGAGCAA         |
| NXK2.5 hqPCR    | TGGAGAAGACAGAGGCGGACAA       | ATAGACCTGCGCCTGCGAGAA         |
| NKX2.1 hqPCR    | CGGCATGAACATGAGCGGCAT        | GCCGACAGGTACTTCTGTTGCTTG      |
| ODD1 hqPCR      | CAGCTCACCAACTACTCCTTCTTCA    | TGCAACGCGCTGAAACCATAACA       |
| CREB313 hqPCR   | TCTCCAGAACTTTGCACAACGATGC    | TCCTCCGTCGAATTGGTCAGGTT       |
| CEBPA hqPCR     | AGAAGTCGGTGGACAAGAACAGCA     | ATTGTCACTGGTCAGCTCCAGCA       |
